# Supplementary material for: Identification of Candidate Genes Associated with Yak Body Size Using a Genome-Wide Association Study and Multiple Populations of Information
Source: MDPI journal article supplement (doi:10.3390/ani13091470), 2023-04-26
Supplement: s1 [file s1]

## Supplementary Material

**Supplementary Table S1** Distribution area of yak of different breeds and genetic resources

| Variety<br>resources | Location<br>(p-rovinces<br>or autono<br>mous) | Sampling area                                                                                                                                                 | Altitude (m) | Average<br>annual<br>team. (°C) |
|----------------------|-----------------------------------------------|---------------------------------------------------------------------------------------------------------------------------------------------------------------|--------------|---------------------------------|
| Zhongba              | Tibet                                         | Zhongba county, Shigatse, Tibet autonomous region                                                                                                             | 5000         | -4 to 12                        |
| Shenza               |                                               | Located in central Tibet of Shenza county, which between the Gangdis Mountains and the second largest lake in northern Tibet                                  | 4700         | 0.5                             |
| Cona                 |                                               | Located in the southern tip of the Tibet Autonomous Region and the Himalayas southeast of the Cona county                                                     | 4380         | -4 to 8                         |
| Sangsang             |                                               | Ngamring County, Shigatse, Tibet autonomous region                                                                                                            | 4400 to 4600 | 6.5                             |
| Sangri               |                                               | Sangri County, Lhoka, Tibet autonomous region is located at the southern foot of the Gangdis Mountains and in the middle valley of the Yarlung Tsangpo River. | >4065        | 8                               |
| Sibu                 |                                               | Mozhugongka County, Lhasa City, Tibet Autonomous Region is located in the middle and upper reaches of Lhasa River and the west side of Mila Mountain          | 3835         | 2 to 17                         |
| Riduo                |                                               | Riduo Township, Mozhugongka County, Lhasa City, Tibet Autonomous Region                                                                                       | 4370         | 0.8                             |
| Pali                 |                                               | Yadong County, Shigatse, Tibet Autonomous Region                                                                                                              | 3500         | 0                               |
| Nierong              |                                               | Nyainrong County, Naqu, Tibet Autonomous Region                                                                                                               | 4700         | -7 to 7                         |
| Longzi               |                                               | Lhünzê County, Lhoka, Tibet autonomous region                                                                                                                 | 3900         | 5.5                             |
| Leiwuqi              | Qinghai                                       | Riwoqê County, Qamdo, Tibet Autonomous is located in a branch of the Nyainqêntanglha Shanmai and the west of the Boshula Ridge                                | 4500         | 2.5                             |
| Kangbu               |                                               | Kangbu Township, Yadong County, Shigatse, Tibet Autonomous Region                                                                                             | >3500        | -                               |
| Lijia                |                                               | Lhari County, Naqu, Tibet Autonomous Region                                                                                                                   | 4500         | -6 to 8                         |
| Jiangda              |                                               | Jomda County, Qamdo, Tibet Autonomous Region                                                                                                                  | 3650         | 4.5                             |
| Gongbujiangda        |                                               | Gongbo'gyamda County, Nyingchi, Tibet Autonomous Region                                                                                                       | >3600        | 3 to 16                         |
| Baqing               |                                               | Baqing County is located in the northeast of Tibet Autonomous Region, the east of Naqu District, and the upper reaches of salween                             | >4500        | -1                              |
| Dingqing             |                                               | Dênqên County, Qamdo, Tibet Autonomous Region                                                                                                                 | 3850         | 3.4                             |
| Qilian               |                                               | Qilian County is located in the north of Haibei Tibetan Autonomous Prefecture of Qinghai Province, bordering Gansu Province in the east and north             | >2800        | 1                               |
| Huanhu               |                                               | Gangcha County, Haibei Tibetan Autonomous Prefecture of                                                                                                       | 3300         | -0.6                            |

|           |                       |                                                                                                                                                                                                       |              |      |
|-----------|-----------------------|-------------------------------------------------------------------------------------------------------------------------------------------------------------------------------------------------------|--------------|------|
|           |                       | Qinghai Province, is located in the north of Qinghai Lake                                                                                                                                             |              |      |
| Gaoyuan   |                       | Tibetan Autonomous Prefecture of Golog, Qinghai Province                                                                                                                                              | 4000 to 5000 | -4   |
| Datong    |                       | Datong Hui and Tu Autonomous County, Xining, Qinghai Province                                                                                                                                         | 2280 to 4622 | 4.9  |
| Maiwa     | Sichuan               | Hongyuan Country, Tibetan Qiang Autonomous Prefecture of Ngawa, Sichuan Province                                                                                                                      | 3500         | 2.9  |
| Jiulong   |                       | Jiulong Country, Tibetan Qiang Autonomous Prefecture of Ngawa, Sichuan Province                                                                                                                       | 1440 to 6000 | 4.9  |
| Changtai  |                       | Baiyu County, Tibetan Qiang Autonomous Prefecture of Ngawa, Sichuan Province                                                                                                                          | 3500         | 12.3 |
| Jinchuan  |                       | Jinchuan Country, Tibetan Qiang Autonomous Prefecture of Ngawa, Sichuan Province                                                                                                                      | 1950 to 5000 | 12.4 |
| Tianzhu   | Gansu                 | Tianzhu Zangzu Autonomous County, Wuwei, Gansu Province                                                                                                                                               | 2040 to 4874 | 3.5  |
| Gannan    |                       | Maqu County is located at the east end of the Qinghai Tibet Plateau and the southwest of Gannan Tibetan Autonomous Prefecture                                                                         | 3700         | 1.2  |
| Xinjiang  | Xinjiang              | Tajik Autonomous County of Taxkorgan, Kashgar Prefecture, Xinjiang Autonomous Rgion                                                                                                                   | 3600         | 3.3  |
| Bazhou    |                       | Korla City, Bayingol Mongolian Autonomous Prefecture, Xinjiang Autonomous Rgion, is Located in the middle of Xinjiang, the southern foot of Tianshan Mountains, and the northeast edge of Tarim Basin | 934          | 11.4 |
| Zhongdian | Yunnan                | Zhongdian county in Diqin Tibetan autonomous prefecture                                                                                                                                               | 3450         | 5.5  |
| Wild yak  | Qinghai-Tibet Plateau | -                                                                                                                                                                                                     | -            | -    |

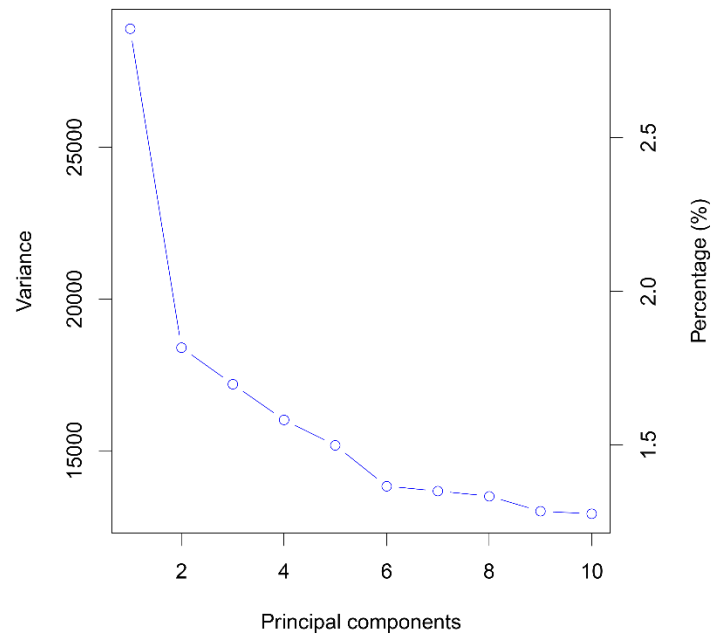

**Supplementary Figure S1** Genetic variance explained and percentage of overall with Principal components of each dimension. The horizontal coordinates indicate the principal components of the different dimensions; The left vertical coordinate indicates the genetic variance explained by each principal component; The right vertical coordinate indicates the percentage of the overall variance accounted for by each principal component.

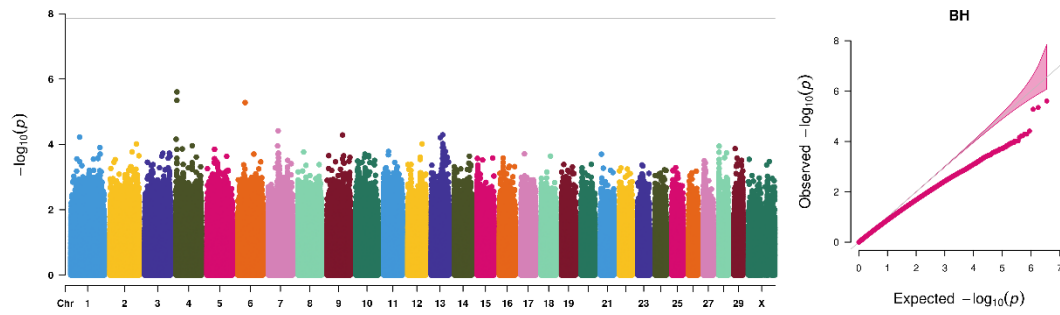

**Supplementary Figure S2** Manhattan (left) and quantile-quantile plots (right) of the  $p$ -values for the genome-wide association study for body height (BH) of yaks based on the traditional CMLM method, the horizontal line of significance threshold ( $p$ -value  $< 1.39 \times 10^{-8}$ ) was used to distinguish significantly associated loci, and the different colors to distinguish different chromosomes.

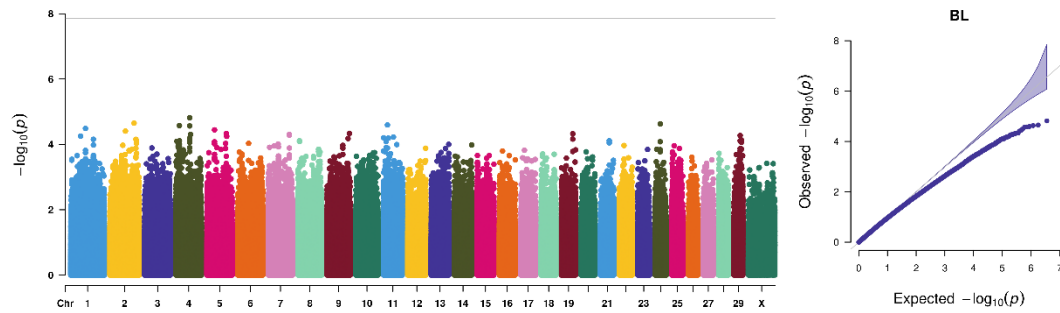

**Supplementary Figure S3** Manhattan (left) and quantile-quantile plots (right) of the  $p$ -values for the genome-wide association study for body length (BL) of yaks based on the traditional CMLM method, the horizontal line of significance threshold ( $p$ -value  $< 1.39 \times 10^{-8}$ ) was used to distinguish significantly associated loci, and the different colors to distinguish different chromosomes.

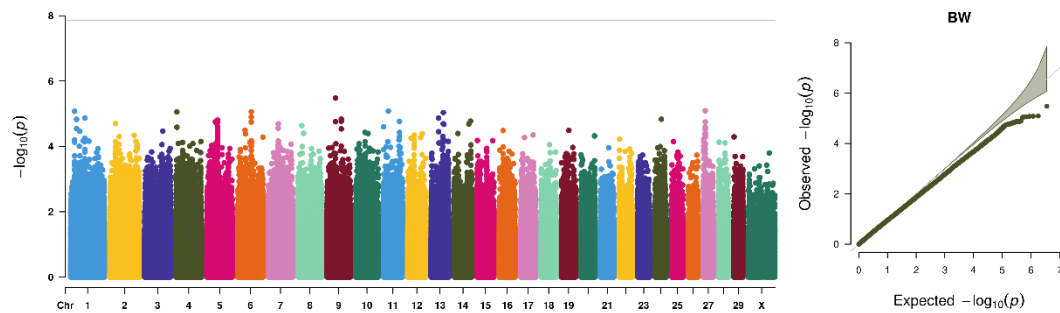

**Supplementary Figure S4** Manhattan (left) and quantile-quantile plots (right) of the  $p$ -values for the genome-wide association study for body weight (BW) of yaks based on the traditional CMLM method, the horizontal line of significance threshold ( $p$ -value  $< 1.39 \times 10^{-8}$ ) was used to distinguish significantly associated loci, and the different colors to distinguish different chromosomes.

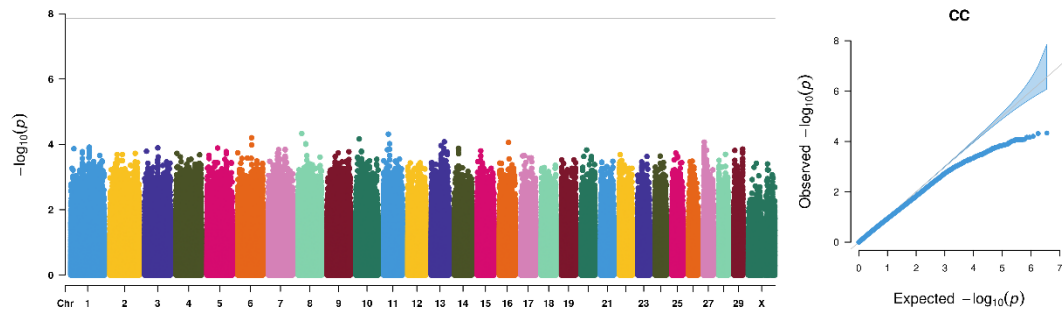

**Supplementary Figure S5** Manhattan (left) and quantile-quantile plots (right) of the  $p$ -values for the genome-wide association study for chest circumference (CC) of yaks based on the traditional CMLM method, the horizontal line of significance threshold ( $p$ -value  $< 1.39 \times 10^{-8}$ ) was used to distinguish significantly associated loci, and the different colors to distinguish different chromosomes.

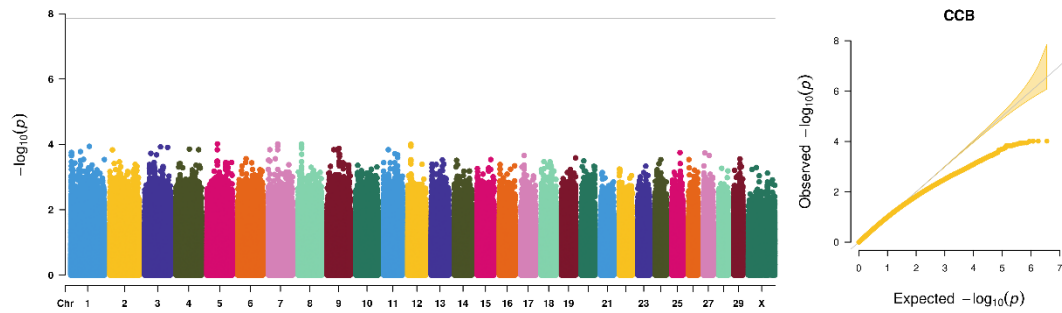

**Supplementary Figure S6** Manhattan (left) and quantile-quantile plots (right) of the  $p$ -values for the genome-wide association study for circumference of cannon bone (CCB) of yaks based on the traditional CMLM method, the horizontal line of significance threshold ( $p$ -value  $< 1.39 \times 10^{-8}$ ) was used to distinguish significantly associated loci, and the different colors to distinguish different chromosomes.
